# Supplementary material
Source: HighWire-hosted journal article supplement (https://www.ajevonline.org/highwire/filestream/1941/field_highwire_adjunct_files/0/Supplemental_Data.pdf)
Supplement: Supplemental_Data.pdf [file Supplemental_Data.pdf]

**Supplemental Data for:**

Gerzon, E., I. Biton, Y. Yaniv, H. Zemach, Y. Netzer, A. Schwartz, A. Fait, and G. Ben-Ari. 2015.

Grapevine anatomy as a possible determinant of isohydric or anisohydric behavior.

Am. J. Enol. Vitic. 66:340-347. doi: 10.5344/ajev.2015.14090.

**Supplemental Table 1** All physiological measurements carried out during 2011 and 2012 experiments. Values are mean  $\pm$  standard errors.

| Year of experiment | Cultivar | Rootstock | Irrigation treatment | Day of experiment | Predawn $\Psi$ leaf (MPa) | Midday $\Psi$ leaf (MPa) | Midday $\Psi$ stem (MPa) | Stomatal conductance (mol/m <sup>2</sup> s) | Midday leaf temperature (°C) |
|--------------------|----------|-----------|----------------------|-------------------|---------------------------|--------------------------|--------------------------|---------------------------------------------|------------------------------|
| 2011               | G        | P         | 25%                  | 0                 | -0.218 $\pm$ 0.039        | -0.988 $\pm$ 0.230       | -0.874 $\pm$ 0.120       | 0.105 $\pm$ 0.023                           | 33.925 $\pm$ 0.983           |
| 2011               | G        | P         | 25%                  | 6                 | -0.695 $\pm$ 0.171        | -0.823 $\pm$ 0.048       | -0.945 $\pm$ 0.061       | 0.04 $\pm$ 0.007                            | 35 $\pm$ 0.920               |
| 2011               | G        | P         | 25%                  | 9                 | -0.75 $\pm$ 0.140         | -0.918 $\pm$ 0.104       |                          | 0.028 $\pm$ 0.005                           | 37.7 $\pm$ 0.662             |
| 2011               | G        | P         | 25%                  | 13                | -0.693 $\pm$ 0.041        | -1.058 $\pm$ 0.144       | -0.668 $\pm$ 0.058       | 0.045 $\pm$ 0.004                           | 36.225 $\pm$ 0.327           |
| 2011               | G        | P         | 25%                  | 16                | -0.48 $\pm$ 0.038         | -0.733 $\pm$ 0.058       | -0.738 $\pm$ 0.085       | 0.05 $\pm$ 0.007                            | 35.775 $\pm$ 0.545           |
| 2011               | G        | P         | 25%                  | 20                | -0.808 $\pm$ 0.102        | -1.123 $\pm$ 0.060       | -1.115 $\pm$ 0.107       | 0.023 $\pm$ 0.007                           | 36.875 $\pm$ 0.733           |
| 2011               | G        | P         | 25%                  | 27                | -0.525 $\pm$ 0.027        | -1.305 $\pm$ 0.118       | -0.89 $\pm$ 0.072        | 0.028 $\pm$ 0.007                           | 34.675 $\pm$ 1.293           |
| 2011               | G        | P         | 25%                  | 34                | -0.728 $\pm$ 0.062        | -1.26 $\pm$ 0.090        | -0.813 $\pm$ 0.073       | 0.055 $\pm$ 0.002                           | 28.975 $\pm$ 0.810           |
| 2011               | G        | P         | 25%                  | 48                | -0.76 $\pm$ 0.028         | -1.1 $\pm$ 0.174         | -1.14 $\pm$ 0.117        | 0.043 $\pm$ 0.015                           | 32.925 $\pm$ 1.107           |
| 2011               | G        | P         | 25%                  | 55                | -0.608 $\pm$ 0.034        | -1.297 $\pm$ 0.174       | -0.963 $\pm$ 0.110       | 0.032 $\pm$ 0.006                           | 35.15 $\pm$ 1.894            |
| 2011               | G        | R         | 25%                  | 0                 | -0.221 $\pm$ 0.013        | -1.055 $\pm$ 0.088       | -0.867 $\pm$ 0.070       | 0.125 $\pm$ 0.039                           | 34.425 $\pm$ 0.777           |
| 2011               | G        | R         | 25%                  | 6                 | -0.708 $\pm$ 0.093        | -0.78 $\pm$ 0.100        | -0.803 $\pm$ 0.064       | 0.043 $\pm$ 0.002                           | 34.15 $\pm$ 1.050            |
| 2011               | G        | R         | 25%                  | 9                 | -0.815 $\pm$ 0.156        | -0.83 $\pm$ 0.050        |                          | 0.048 $\pm$ 0.012                           | 37.75 $\pm$ 0.902            |
| 2011               | G        | R         | 25%                  | 13                | -0.698 $\pm$ 0.062        | -1.14 $\pm$ 0.092        | -0.738 $\pm$ 0.069       | 0.04 $\pm$ 0.011                            | 36.625 $\pm$ 0.771           |
| 2011               | G        | R         | 25%                  | 16                | -0.418 $\pm$ 0.036        | -1.188 $\pm$ 0.222       | -0.635 $\pm$ 0.009       | 0.055 $\pm$ 0.013                           | 35.1 $\pm$ 1.398             |
| 2011               | G        | R         | 25%                  | 20                | -0.953 $\pm$ 0.091        | -1.005 $\pm$ 0.065       | -1.3 $\pm$ 0.018         | 0.013 $\pm$ 0.001                           | 38.225 $\pm$ 0.503           |
| 2011               | G        | R         | 25%                  | 27                | -0.613 $\pm$ 0.063        | -1.035 $\pm$ 0.150       | -0.8 $\pm$ 0.066         | 0.033 $\pm$ 0.010                           | 35.575 $\pm$ 0.473           |
| 2011               | G        | R         | 25%                  | 34                | -0.885 $\pm$ 0.047        | -1.143 $\pm$ 0.144       | -0.923 $\pm$ 0.079       | 0.053 $\pm$ 0.008                           | 31.75 $\pm$ 0.497            |
| 2011               | G        | R         | 25%                  | 48                | -0.848 $\pm$ 0.062        | -1.168 $\pm$ 0.039       | -1.333 $\pm$ 0.167       | 0.035 $\pm$ 0.004                           | 34.125 $\pm$ 0.743           |
| 2011               | G        | R         | 25%                  | 55                | -0.648 $\pm$ 0.032        | -1.361 $\pm$ 0.123       | -0.934 $\pm$ 0.054       | 0.044 $\pm$ 0.005                           | 34.85 $\pm$ 0.473            |
| 2011               | S        | P         | 25%                  | 0                 | -0.187 $\pm$ 0.018        | -1.036 $\pm$ 0.137       | -0.99 $\pm$ 0.120        | 0.11 $\pm$ 0.052                            | 33.6 $\pm$ 0.909             |
| 2011               | S        | P         | 25%                  | 6                 | -0.723 $\pm$ 0.095        | -1.255 $\pm$ 0.193       | -0.895 $\pm$ 0.039       | 0.055 $\pm$ 0.028                           | 33.45 $\pm$ 0.793            |
| 2011               | S        | P         | 25%                  | 9                 | -0.855 $\pm$ 0.089        | -1.078 $\pm$ 0.098       |                          | 0.073 $\pm$ 0.031                           | 36.425 $\pm$ 1.010           |
| 2011               | S        | P         | 25%                  | 13                | -0.743 $\pm$ 0.052        | -1.43 $\pm$ 0.224        | -0.913 $\pm$ 0.109       | 0.075 $\pm$ 0.037                           | 34.525 $\pm$ 0.937           |
| 2011               | S        | P         | 25%                  | 16                | -0.55 $\pm$ 0.022         | -1.57 $\pm$ 0.072        | -0.685 $\pm$ 0.057       | 0.075 $\pm$ 0.027                           | 33.475 $\pm$ 0.344           |
| 2011               | S        | P         | 25%                  | 20                | -0.77 $\pm$ 0.105         | -1.233 $\pm$ 0.042       | -1.11 $\pm$ 0.272        | 0.045 $\pm$ 0.018                           | 35.375 $\pm$ 0.349           |
| 2011               | S        | P         | 25%                  | 27                | -0.75 $\pm$ 0.134         | -1.585 $\pm$ 0.167       | -0.943 $\pm$ 0.031       | 0.063 $\pm$ 0.006                           | 33.55 $\pm$ 0.405            |
| 2011               | S        | P         | 25%                  | 34                | -0.823 $\pm$ 0.027        | -1.505 $\pm$ 0.124       | -1.02 $\pm$ 0.046        | 0.08 $\pm$ 0.011                            | 31.075 $\pm$ 1.032           |
| 2011               | S        | P         | 25%                  | 48                | -1.175 $\pm$ 0.253        | -1.388 $\pm$ 0.042       | -1.398 $\pm$ 0.131       | 0.075 $\pm$ 0.022                           | 33.425 $\pm$ 0.845           |
| 2011               | S        | P         | 25%                  | 55                | -0.928 $\pm$ 0.207        | -1.52 $\pm$ 0.179        | -1.028 $\pm$ 0.130       | 0.045 $\pm$ 0.010                           | 32.425 $\pm$ 0.546           |
| 2011               | S        | R         | 25%                  | 0                 | -0.176 $\pm$ 0.011        | -1.144 $\pm$ 0.135       | -1.083 $\pm$ 0.167       | 0.095 $\pm$ 0.015                           | 34.6 $\pm$ 1.719             |
| 2011               | S        | R         | 25%                  | 6                 | -0.735 $\pm$ 0.039        | -1.243 $\pm$ 0.154       | -0.713 $\pm$ 0.065       | 0.05 $\pm$ 0.014                            | 35 $\pm$ 0.667               |
| 2011               | S        | R         | 25%                  | 9                 | -0.76 $\pm$ 0.040         | -1.023 $\pm$ 0.192       |                          | 0.045 $\pm$ 0.014                           | 37.15 $\pm$ 0.651            |
| 2011               | S        | R         | 25%                  | 13                | -0.775 $\pm$ 0.059        | -1.33 $\pm$ 0.234        | -0.73 $\pm$ 0.051        | 0.08 $\pm$ 0.021                            | 34.975 $\pm$ 1.186           |
| 2011               | S        | R         | 25%                  | 16                | -0.485 $\pm$ 0.032        | -1.253 $\pm$ 0.175       | -0.795 $\pm$ 0.168       | 0.073 $\pm$ 0.016                           | 34.075 $\pm$ 0.779           |
| 2011               | S        | R         | 25%                  | 20                | -0.973 $\pm$ 0.107        | -1.11 $\pm$ 0.073        | -1.268 $\pm$ 0.084       | 0.038 $\pm$ 0.009                           | 36.85 $\pm$ 0.913            |
| 2011               | S        | R         | 25%                  | 27                | -0.655 $\pm$ 0.080        | -1.408 $\pm$ 0.182       | -0.865 $\pm$ 0.068       | 0.05 $\pm$ 0.008                            | 34.7 $\pm$ 1.438             |
| 2011               | S        | R         | 25%                  | 34                | -0.878 $\pm$ 0.079        | -1.473 $\pm$ 0.287       | -0.863 $\pm$ 0.045       | 0.053 $\pm$ 0.009                           | 29.75 $\pm$ 0.366            |
| 2011               | S        | R         | 25%                  | 48                | -0.775 $\pm$ 0.087        | -1.505 $\pm$ 0.155       | -1.415 $\pm$ 0.074       | 0.058 $\pm$ 0.013                           | 32.625 $\pm$ 0.965           |
| 2011               | S        | R         | 25%                  | 55                | -0.764 $\pm$ 0.026        | -1.296 $\pm$ 0.191       | -1.006 $\pm$ 0.096       | 0.065 $\pm$ 0.028                           | 33.175 $\pm$ 0.924           |
| 2011               | G        | P         | 50%                  | 0                 | -0.22 $\pm$ 0.04          | -1.33 $\pm$ 0.12         | -0.96 $\pm$ 0.1          | 0.14 $\pm$ 0.03                             | 33.05 $\pm$ 1.1              |
| 2011               | G        | P         | 50%                  | 6                 | -0.54 $\pm$ 0.03          | -1.33 $\pm$ 0.06         | -0.78 $\pm$ 0.06         | 0.11 $\pm$ 0.02                             | 34.08 $\pm$ 1.28             |
| 2011               | G        | P         | 50%                  | 9                 | -0.55 $\pm$ 0.04          | -1.47 $\pm$ 0.14         |                          | 0.11 $\pm$ 0.01                             | 33.7 $\pm$ 0.52              |
| 2011               | G        | P         | 50%                  | 13                | -0.49 $\pm$ 0.06          | -0.97 $\pm$ 0.13         | -0.67 $\pm$ 0.05         | 0.07 $\pm$ 0.01                             | 32.93 $\pm$ 0.93             |
| 2011               | G        | P         | 50%                  | 16                | -0.41 $\pm$ 0.03          | -1.07 $\pm$ 0.14         | -0.65 $\pm$ 0.08         | 0.05 $\pm$ 0.01                             | 33.35 $\pm$ 0.86             |
| 2011               | G        | P         | 50%                  | 20                | -0.67 $\pm$ 0.06          | -0.96 $\pm$ 0.1          | -0.75 $\pm$ 0.09         | 0.08 $\pm$ 0.01                             | 32.4 $\pm$ 0.15              |
| 2011               | G        | P         | 50%                  | 27                |                           | -0.97 $\pm$ 0.24         | -0.65 $\pm$ 0.08         | 0.04 $\pm$                                  | 31.93 $\pm$ 0.7              |
| 2011               | G        | P         | 50%                  | 34                | -0.62 $\pm$ 0.11          | -1.12 $\pm$ 0.19         | -0.73 $\pm$ 0.06         | 0.04 $\pm$ 0.01                             | 30.23 $\pm$ 1.1              |
| 2011               | G        | P         | 50%                  | 48                | -0.95 $\pm$ 0.04          | -0.93 $\pm$ 0.07         | -1.01 $\pm$ 0.08         | 0.05 $\pm$ 0.02                             | 34.25 $\pm$ 0.67             |
| 2011               | G        | P         | 50%                  | 55                | -0.66 $\pm$ 0.03          | -1.32 $\pm$ 0.14         | -0.84 $\pm$ 0.05         | 0.12 $\pm$ 0.04                             | 33.53 $\pm$ 0.77             |
| 2011               | G        | R         | 50%                  | 0                 | -0.18 $\pm$ 0.03          | -1.25 $\pm$ 0.03         | -1.09 $\pm$ 0.09         | 0.07 $\pm$ 0.03                             | 33.6 $\pm$ 0.86              |

**Supplemental Data for:**

Gerzon, E., I. Biton, Y. Yaniv, H. Zemach, Y. Netzer, A. Schwartz, A. Fait, and G. Ben-Ari. 2015.

Grapevine anatomy as a possible determinant of isohydric or anisohydric behavior.

Am. J. Enol. Vitic. 66:340-347. doi: 10.5344/ajev.2015.14090.

**Supplemental Table 1** All physiological measurements carried out during 2011 and 2012 experiments. Values are mean  $\pm$  standard errors.

| Year of experiment | Cultivar | Rootstock | Irrigation treatment | Day of experiment | Predawn $\Psi_{leaf}$ (MPa) | Midday $\Psi_{leaf}$ (MPa) | Midday $\Psi_{stem}$ (MPa) | Stomatal conductance (mol/m <sup>2</sup> s) | Midday leaf temperature (°C) |
|--------------------|----------|-----------|----------------------|-------------------|-----------------------------|----------------------------|----------------------------|---------------------------------------------|------------------------------|
| 2011               | G        | R         | 50%                  | 6                 | -0.45 $\pm$ 0.08            | -0.88 $\pm$ 0.09           | -0.85 $\pm$ 0.08           | 0.06 $\pm$ 0.02                             | 34.2 $\pm$ 0.47              |
| 2011               | G        | R         | 50%                  | 9                 | -0.42 $\pm$ 0.09            | -0.83 $\pm$ 0.1            |                            | 0.06 $\pm$ 0.03                             | 37.33 $\pm$ 0.55             |
| 2011               | G        | R         | 50%                  | 13                | -0.42 $\pm$ 0.1             | -1.06 $\pm$ 0.08           | -0.62 $\pm$ 0.01           | 0.06 $\pm$ 0.02                             | 35.78 $\pm$ 0.56             |
| 2011               | G        | R         | 50%                  | 16                | -0.41 $\pm$ 0.05            | -0.96 $\pm$ 0.11           | -0.54 $\pm$ 0.05           | 0.03 $\pm$ 0.01                             | 34.93 $\pm$ 0.81             |
| 2011               | G        | R         | 50%                  | 20                | -0.61 $\pm$ 0.06            | -1.05 $\pm$ 0.13           | -0.69 $\pm$ 0.08           | 0.09 $\pm$ 0.01                             | 35.38 $\pm$ 0.63             |
| 2011               | G        | R         | 50%                  | 27                |                             | -0.87 $\pm$ 0.08           | -0.57 $\pm$ 0.09           | 0.08 $\pm$ 0.02                             | 33.45 $\pm$ 0.49             |
| 2011               | G        | R         | 50%                  | 34                | -0.46 $\pm$ 0.08            | -1.29 $\pm$ 0.18           | -0.8 $\pm$ 0.07            | 0.05 $\pm$                                  | 29.75 $\pm$ 0.46             |
| 2011               | G        | R         | 50%                  | 48                | -0.7 $\pm$ 0.1              | -1.13 $\pm$ 0.12           | -0.83 $\pm$ 0.08           | 0.05 $\pm$ 0.01                             | 32.7 $\pm$ 0.69              |
| 2011               | G        | R         | 50%                  | 55                | -0.58 $\pm$ 0.08            | -1.23 $\pm$ 0.14           | -0.77 $\pm$ 0.09           | 0.13 $\pm$ 0.02                             | 29.03 $\pm$ 2.36             |
| 2011               | S        | P         | 50%                  | 0                 | -0.22 $\pm$ 0.03            | -1.13 $\pm$ 0.1            | -0.86 $\pm$ 0.1            | 0.15 $\pm$ 0.03                             | 33.85 $\pm$ 0.65             |
| 2011               | S        | P         | 50%                  | 6                 | -0.5 $\pm$ 0.05             | -1.55 $\pm$ 0.05           | -0.92 $\pm$ 0.15           | 0.13 $\pm$ 0.02                             | 34.38 $\pm$ 1.07             |
| 2011               | S        | P         | 50%                  | 9                 | -0.46 $\pm$ 0.05            | -1.48 $\pm$ 0.05           |                            | 0.15 $\pm$ 0.02                             | 34.65 $\pm$ 1.03             |
| 2011               | S        | P         | 50%                  | 13                | -0.54 $\pm$ 0.01            | -1.25 $\pm$ 0.13           | -0.79 $\pm$ 0.05           | 0.14 $\pm$ 0.03                             | 34.53 $\pm$ 1.2              |
| 2011               | S        | P         | 50%                  | 16                | -0.52 $\pm$ 0.05            | -1.14 $\pm$ 0.13           | -0.69 $\pm$ 0.09           | 0.07 $\pm$ 0.01                             | 33.7 $\pm$ 1.07              |
| 2011               | S        | P         | 50%                  | 20                | -0.68 $\pm$ 0.06            | -1.65 $\pm$ 0.06           | -0.86 $\pm$ 0.17           | 0.09 $\pm$ 0.02                             | 33.78 $\pm$ 0.75             |
| 2011               | S        | P         | 50%                  | 27                |                             | -1.49 $\pm$ 0.02           | -0.92 $\pm$ 0.1            | 0.09 $\pm$ 0.03                             | 33.1 $\pm$ 0.73              |
| 2011               | S        | P         | 50%                  | 34                | -0.56 $\pm$ 0.02            | -1.4 $\pm$ 0.11            | -0.81 $\pm$ 0.07           | 0.08 $\pm$ 0.03                             | 27.75 $\pm$ 0.8              |
| 2011               | S        | P         | 50%                  | 48                | -0.7 $\pm$ 0.1              | -1.34 $\pm$ 0.04           | -1.12 $\pm$ 0.08           | 0.1 $\pm$ 0.03                              | 32.13 $\pm$ 0.38             |
| 2011               | S        | P         | 50%                  | 55                | -0.57 $\pm$ 0.01            | -1.56 $\pm$ 0.08           | -0.98 $\pm$ 0.03           | 0.15 $\pm$ 0.03                             | 34.15 $\pm$ 0.34             |
| 2011               | S        | R         | 50%                  | 0                 | -0.17 $\pm$ 0.04            | -1.16 $\pm$ 0.14           | -1.3 $\pm$ 0.05            | 0.14 $\pm$ 0.02                             | 33.1 $\pm$ 1.22              |
| 2011               | S        | R         | 50%                  | 6                 | -0.37 $\pm$ 0.04            | -0.92 $\pm$ 0.14           | -1.06 $\pm$ 0.03           | 0.13 $\pm$ 0.02                             | 34.5 $\pm$ 1.4               |
| 2011               | S        | R         | 50%                  | 9                 | -0.38 $\pm$ 0.07            | -1.14 $\pm$ 0.14           |                            | 0.11 $\pm$ 0.02                             | 34.85 $\pm$ 0.41             |
| 2011               | S        | R         | 50%                  | 13                | -0.49 $\pm$ 0.08            | -1.22 $\pm$ 0.1            | -0.67 $\pm$ 0.03           | 0.14 $\pm$ 0.01                             | 34.4 $\pm$ 0.3               |
| 2011               | S        | R         | 50%                  | 16                | -0.44 $\pm$ 0.03            | -1.46 $\pm$ 0.26           | -0.67 $\pm$ 0.05           | 0.11 $\pm$ 0.02                             | 32.58 $\pm$ 0.74             |
| 2011               | S        | R         | 50%                  | 20                | -0.61 $\pm$ 0.07            | -1.42 $\pm$ 0.13           | -0.86 $\pm$ 0.07           | 0.13 $\pm$ 0.01                             | 33.63 $\pm$ 0.6              |
| 2011               | S        | R         | 50%                  | 27                |                             | -1.18 $\pm$ 0.17           | -0.68 $\pm$ 0.04           | 0.12 $\pm$ 0.03                             | 33.43 $\pm$ 0.46             |
| 2011               | S        | R         | 50%                  | 34                | -0.63 $\pm$ 0.03            | -1.42 $\pm$ 0.18           | -0.79 $\pm$ 0.06           | 0.13 $\pm$ 0.02                             | 30.68 $\pm$ 0.54             |
| 2011               | S        | R         | 50%                  | 48                | -0.77 $\pm$ 0.09            | -1.14 $\pm$ 0.1            | -0.94 $\pm$ 0.08           | 0.14 $\pm$ 0.04                             | 32.25 $\pm$ 1.32             |
| 2011               | S        | R         | 50%                  | 55                | -0.68 $\pm$ 0.08            | -1.3 $\pm$ 0.17            | -0.93 $\pm$ 0.06           | 0.08 $\pm$ 0.02                             | 32.18 $\pm$ 1.67             |
| 2011               | G        | P         | 75%                  | 0                 | -0.23 $\pm$ 0.05            | -1.22 $\pm$ 0.11           | -1.03 $\pm$ 0.18           | 0.07 $\pm$ 0.01                             | 33.78 $\pm$ 0.91             |
| 2011               | G        | P         | 75%                  | 6                 | -0.35 $\pm$ 0.04            | -1.26 $\pm$ 0.09           | -0.91 $\pm$ 0.07           | 0.06 $\pm$ 0.02                             | 34.6 $\pm$ 0.55              |
| 2011               | G        | P         | 75%                  | 9                 | -0.34 $\pm$ 0.03            | -1.01 $\pm$ 0.11           |                            | 0.07 $\pm$ 0.01                             | 35.03 $\pm$ 1.05             |
| 2011               | G        | P         | 75%                  | 13                | -0.35 $\pm$ 0.02            | -1.14 $\pm$ 0.23           | -0.69 $\pm$ 0.03           | 0.06 $\pm$ 0.01                             | 37.28 $\pm$ 0.75             |
| 2011               | G        | P         | 75%                  | 16                | -0.37 $\pm$ 0.04            | -1.12 $\pm$ 0.16           | -0.69 $\pm$ 0.04           | 0.07 $\pm$ 0.01                             | 35.25 $\pm$ 0.91             |
| 2011               | G        | P         | 75%                  | 20                | -0.51 $\pm$ 0.06            | -1.06 $\pm$ 0.17           | -0.77 $\pm$ 0.07           | 0.08 $\pm$ 0.03                             | 35.38 $\pm$ 0.92             |
| 2011               | G        | P         | 75%                  | 27                | -0.34 $\pm$ 0.02            | -1.04 $\pm$ 0.09           | -0.63 $\pm$ 0.06           | 0.09 $\pm$ 0.02                             | 32.5 $\pm$ 0.72              |
| 2011               | G        | P         | 75%                  | 34                | -0.45 $\pm$ 0.06            | -1.27 $\pm$ 0.17           | -0.6 $\pm$ 0.01            | 0.07 $\pm$ 0.01                             | 29.25 $\pm$ 1.14             |
| 2011               | G        | P         | 75%                  | 48                | -0.58 $\pm$ 0.06            | -0.97 $\pm$ 0.04           | -0.73 $\pm$ 0.03           | 0.09 $\pm$ 0.01                             | 32.43 $\pm$ 0.57             |
| 2011               | G        | P         | 75%                  | 55                | -0.46 $\pm$ 0.04            | -1.18 $\pm$ 0.06           | -0.75 $\pm$ 0.03           | 0.14 $\pm$ 0.05                             | 33.88 $\pm$ 1.06             |
| 2011               | G        | R         | 75%                  | 0                 | -0.19 $\pm$ 0.04            | -0.9 $\pm$ 0.13            | -0.84 $\pm$ 0.06           | 0.1 $\pm$ 0.01                              | 32.25 $\pm$ 0.86             |
| 2011               | G        | R         | 75%                  | 6                 | -0.29 $\pm$ 0.04            | -1.06 $\pm$ 0.25           | -0.75 $\pm$ 0.01           | 0.08 $\pm$ 0.01                             | 35.25 $\pm$ 0.42             |
| 2011               | G        | R         | 75%                  | 9                 | -0.29 $\pm$ 0.05            | -0.86 $\pm$ 0.17           |                            | 0.09 $\pm$ 0.01                             | 35.43 $\pm$ 0.43             |
| 2011               | G        | R         | 75%                  | 13                | -0.3 $\pm$ 0.04             | -0.98 $\pm$ 0.17           | -0.67 $\pm$ 0.06           | 0.08 $\pm$ 0.01                             | 35.18 $\pm$ 1.08             |
| 2011               | G        | R         | 75%                  | 16                | -0.39 $\pm$ 0.04            | -1.07 $\pm$ 0.18           | -0.81 $\pm$ 0.04           | 0.05 $\pm$ 0.01                             | 33.83 $\pm$ 0.21             |
| 2011               | G        | R         | 75%                  | 20                | -0.5 $\pm$ 0.07             | -1.15 $\pm$ 0.18           | -0.72 $\pm$ 0.06           | 0.07 $\pm$ 0.01                             | 32.38 $\pm$ 0.4              |
| 2011               | G        | R         | 75%                  | 27                | -0.37 $\pm$ 0.04            | -0.98 $\pm$ 0.09           | -0.65 $\pm$ 0.03           | 0.06 $\pm$ 0.01                             | 31.45 $\pm$ 0.63             |
| 2011               | G        | R         | 75%                  | 34                | -0.46 $\pm$ 0.03            | -1.04 $\pm$ 0.15           | -0.59 $\pm$ 0.04           | 0.08 $\pm$ 0.01                             | 29 $\pm$ 0.57                |
| 2011               | G        | R         | 75%                  | 48                | -0.49 $\pm$ 0.04            | -0.92 $\pm$ 0.05           | -0.76 $\pm$ 0.02           | 0.08 $\pm$ 0.01                             | 31.33 $\pm$ 0.15             |
| 2011               | G        | R         | 75%                  | 55                | -0.5 $\pm$ 0.03             | -1.03 $\pm$ 0.03           | -0.7 $\pm$ 0.04            | 0.1 $\pm$ 0.04                              | 33.8 $\pm$ 0.6               |
| 2011               | S        | P         | 75%                  | 0                 | -0.21 $\pm$ 0.04            | -1.27 $\pm$ 0.03           | -1.05 $\pm$ 0.11           | 0.11 $\pm$ 0.02                             | 34.08 $\pm$ 0.79             |
| 2011               | S        | P         | 75%                  | 6                 | -0.37 $\pm$ 0.06            | -1.16 $\pm$ 0.22           | -0.99 $\pm$ 0.16           | 0.13 $\pm$ 0.03                             | 35.6 $\pm$ 1.42              |

**Supplemental Data for:**

Gerzon, E., I. Biton, Y. Yaniv, H. Zemach, Y. Netzer, A. Schwartz, A. Fait, and G. Ben-Ari. 2015.

Grapevine anatomy as a possible determinant of isohydric or anisohydric behavior.

Am. J. Enol. Vitic. 66:340-347. doi: 10.5344/ajev.2015.14090.

**Supplemental Table 1** All physiological measurements carried out during 2011 and 2012 experiments. Values are mean  $\pm$  standard errors.

| Year of experiment | Cultivar | Rootstock | Irrigation treatment | Day of experiment | Predawn $\Psi_{leaf}$ (MPa) | Midday $\Psi_{leaf}$ (MPa) | Midday $\Psi_{stem}$ (MPa) | Stomatal conductance (mol/m <sup>2</sup> s) | Midday leaf temperature (°C) |
|--------------------|----------|-----------|----------------------|-------------------|-----------------------------|----------------------------|----------------------------|---------------------------------------------|------------------------------|
| 2011               | S        | P         | 75%                  | 9                 | -0.36 $\pm$ 0.05            | -0.92 $\pm$ 0.07           |                            | 0.12 $\pm$ 0.03                             | 34.18 $\pm$ 0.34             |
| 2011               | S        | P         | 75%                  | 13                | -0.38 $\pm$ 0.04            | -1.53 $\pm$ 0.09           | -0.8 $\pm$ 0.11            | 0.12 $\pm$ 0.02                             | 33.58 $\pm$ 0.99             |
| 2011               | S        | P         | 75%                  | 16                | -0.41 $\pm$ 0.04            | -1.21 $\pm$ 0.3            | -0.55 $\pm$ 0.02           | 0.1 $\pm$ 0.02                              | 32.5 $\pm$ 1.04              |
| 2011               | S        | P         | 75%                  | 20                | -0.51 $\pm$ 0.04            | -1.24 $\pm$ 0.18           | -1 $\pm$ 0.21              | 0.1 $\pm$ 0.01                              | 33.3 $\pm$ 1.36              |
| 2011               | S        | P         | 75%                  | 27                | -0.43 $\pm$ 0.04            | -1.42 $\pm$ 0.27           | -0.95 $\pm$ 0.21           | 0.07 $\pm$ 0.01                             | 33.48 $\pm$ 0.98             |
| 2011               | S        | P         | 75%                  | 34                | -0.58 $\pm$ 0.04            | -1.6 $\pm$ 0.1             | -0.72 $\pm$ 0.04           | 0.12 $\pm$ 0.02                             | 30.1 $\pm$ 1.28              |
| 2011               | S        | P         | 75%                  | 48                | -0.59 $\pm$ 0.05            | -1.47 $\pm$ 0.21           | -0.84 $\pm$ 0.05           | 0.08 $\pm$ 0.02                             | 32.55 $\pm$ 0.74             |
| 2011               | S        | P         | 75%                  | 55                | -0.59 $\pm$ 0.06            | -1.11 $\pm$ 0.09           | -0.91 $\pm$ 0.07           | 0.11 $\pm$ 0.03                             | 34.05 $\pm$ 1.25             |
| 2011               | S        | R         | 75%                  | 0                 | -0.21 $\pm$ 0.02            | -1.11 $\pm$ 0.13           | -0.99 $\pm$ 0.13           | 0.11 $\pm$ 0.04                             | 33.68 $\pm$ 1.63             |
| 2011               | S        | R         | 75%                  | 6                 | -0.38 $\pm$ 0.02            | -1.35 $\pm$ 0.06           | -1.16 $\pm$ 0.15           | 0.09 $\pm$ 0.02                             | 34.58 $\pm$ 0.8              |
| 2011               | S        | R         | 75%                  | 9                 | -0.4 $\pm$ 0.03             | -0.93 $\pm$ 0.13           |                            | 0.11 $\pm$ 0.04                             | 36.73 $\pm$ 1.79             |
| 2011               | S        | R         | 75%                  | 13                | -0.51 $\pm$ 0.07            | -1.27 $\pm$ 0.19           | -0.69 $\pm$ 0.02           | 0.09 $\pm$ 0.03                             | 36.53 $\pm$ 1.56             |
| 2011               | S        | R         | 75%                  | 16                | -0.47 $\pm$ 0.03            | -1.11 $\pm$ 0.2            | -0.67 $\pm$ 0.02           | 0.08 $\pm$ 0.02                             | 34.85 $\pm$ 1.09             |
| 2011               | S        | R         | 75%                  | 20                | -0.64 $\pm$ 0.08            | -1.03 $\pm$ 0.07           | -1.04 $\pm$ 0.11           | 0.12 $\pm$ 0.01                             | 35.1 $\pm$ 1.35              |
| 2011               | S        | R         | 75%                  | 27                | -0.44 $\pm$ 0.02            | -1.43 $\pm$ 0.28           | -0.75 $\pm$ 0.04           | 0.09 $\pm$ 0.02                             | 34.75 $\pm$ 0.87             |
| 2011               | S        | R         | 75%                  | 34                | -0.54 $\pm$ 0.06            | -1.21 $\pm$ 0.23           | -0.67 $\pm$ 0.04           | 0.09 $\pm$ 0.03                             | 32.08 $\pm$ 0.73             |
| 2011               | S        | R         | 75%                  | 48                | -0.61 $\pm$ 0.03            | -1.07 $\pm$ 0.1            | -0.78 $\pm$ 0.02           | 0.11 $\pm$ 0.04                             | 33.93 $\pm$ 1.31             |
| 2011               | S        | R         | 75%                  | 55                | -0.57 $\pm$ 0.03            | -1.44 $\pm$ 0.16           | -0.83 $\pm$ 0.07           | 0.11 $\pm$ 0.04                             | 34.13 $\pm$ 0.91             |
| 2011               | G        | P         | 100%                 | 0                 | -0.218 $\pm$ 0.028          | -0.988 $\pm$ 0.111         | -0.874 $\pm$ 0.076         | 0.105 $\pm$ 0.035                           | 33.925 $\pm$ 0.753           |
| 2011               | G        | P         | 100%                 | 6                 | -0.355 $\pm$ 0.025          | -0.833 $\pm$ 0.045         | -0.813 $\pm$ 0.016         | 0.11 $\pm$ 0.018                            | 34.425 $\pm$ 1.734           |
| 2011               | G        | P         | 100%                 | 9                 | -0.325 $\pm$ 0.051          | -0.925 $\pm$ 0.041         |                            | 0.1 $\pm$ 0.021                             | 35.65 $\pm$ 0.660            |
| 2011               | G        | P         | 100%                 | 13                | -0.525 $\pm$ 0.078          | -1.333 $\pm$ 0.070         | -0.697 $\pm$ 0.024         | 0.103 $\pm$ 0.016                           | 34.75 $\pm$ 0.525            |
| 2011               | G        | P         | 100%                 | 16                | -0.363 $\pm$ 0.034          | -0.688 $\pm$ 0.069         | -0.6 $\pm$ 0.033           | 0.078 $\pm$ 0.010                           | 33.7 $\pm$ 0.815             |
| 2011               | G        | P         | 100%                 | 20                | -0.493 $\pm$ 0.052          | -0.965 $\pm$ 0.111         | -0.675 $\pm$ 0.015         | 0.063 $\pm$ 0.010                           | 34.85 $\pm$ 1.485            |
| 2011               | G        | P         | 100%                 | 27                | -0.403 $\pm$ 0.038          | -1.078 $\pm$ 0.179         | -0.663 $\pm$ 0.044         | 0.083 $\pm$ 0.014                           | 33.05 $\pm$ 0.961            |
| 2011               | G        | P         | 100%                 | 34                | -0.49 $\pm$ 0.023           | -1.175 $\pm$ 0.122         | -0.578 $\pm$ 0.049         | 0.085 $\pm$ 0.011                           | 29.575 $\pm$ 1.420           |
| 2011               | G        | P         | 100%                 | 48                | -0.613 $\pm$ 0.088          | -0.908 $\pm$ 0.079         | -0.688 $\pm$ 0.043         | 0.078 $\pm$ 0.014                           | 32.975 $\pm$ 0.712           |
| 2011               | G        | P         | 100%                 | 55                | -0.42 $\pm$ 0.055           | -1.085 $\pm$ 0.045         | -0.693 $\pm$ 0.030         | 0.09 $\pm$ 0.025                            | 34.05 $\pm$ 1.096            |
| 2011               | G        | R         | 100%                 | 0                 | -0.221 $\pm$ 0.037          | -1.055 $\pm$ 0.154         | -0.867 $\pm$ 0.037         | 0.125 $\pm$ 0.033                           | 34.425 $\pm$ 0.965           |
| 2011               | G        | R         | 100%                 | 6                 | -0.3 $\pm$ 0.022            | -1.028 $\pm$ 0.165         | -0.863 $\pm$ 0.111         | 0.123 $\pm$ 0.007                           | 34.4 $\pm$ 1.047             |
| 2011               | G        | R         | 100%                 | 9                 | -0.258 $\pm$ 0.021          | -1.353 $\pm$ 0.106         |                            | 0.115 $\pm$ 0.011                           | 33.8 $\pm$ 0.141             |
| 2011               | G        | R         | 100%                 | 13                | -0.45 $\pm$ 0.02            | -1.083 $\pm$ 0.015         | -0.76 $\pm$ 0.082          | 0.088 $\pm$ 0.015                           | 35.025 $\pm$ 0.503           |
| 2011               | G        | R         | 100%                 | 16                | -0.308 $\pm$ 0.023          | -1.355 $\pm$ 0.086         | -0.598 $\pm$ 0.020         | 0.075 $\pm$ 0.010                           | 33.55 $\pm$ 0.429            |
| 2011               | G        | R         | 100%                 | 20                | -0.483 $\pm$ 0.014          | -1.07 $\pm$ 0.064          | -0.7 $\pm$ 0.056           | 0.075 $\pm$ 0.010                           | 32.875 $\pm$ 0.356           |
| 2011               | G        | R         | 100%                 | 27                | -0.335 $\pm$ 0.045          | -1.188 $\pm$ 0.153         | -0.64 $\pm$ 0.054          | 0.078 $\pm$ 0.021                           | 33.025 $\pm$ 0.392           |
| 2011               | G        | R         | 100%                 | 34                | -0.438 $\pm$ 0.038          | -0.945 $\pm$ 0.091         | -0.523 $\pm$ 0.022         | 0.075 $\pm$ 0.014                           | 28.2 $\pm$ 0.933             |
| 2011               | G        | R         | 100%                 | 48                | -0.675 $\pm$ 0.051          | -0.958 $\pm$ 0.108         | -0.57 $\pm$ 0.021          | 0.078 $\pm$ 0.013                           | 31.875 $\pm$ 0.335           |
| 2011               | G        | R         | 100%                 | 55                | -0.399 $\pm$ 0.033          | -1.051 $\pm$ 0.166         | -0.628 $\pm$ 0.027         | 0.068 $\pm$ 0.003                           | 31.625 $\pm$ 1.255           |
| 2011               | S        | P         | 100%                 | 0                 | -0.187 $\pm$ 0.028          | -1.036 $\pm$ 0.185         | -0.99 $\pm$ 0.156          | 0.11 $\pm$ 0.027                            | 33.6 $\pm$ 1.053             |
| 2011               | S        | P         | 100%                 | 6                 | -0.355 $\pm$ 0.013          | -1.285 $\pm$ 0.196         | -1.11 $\pm$ 0.196          | 0.155 $\pm$ 0.036                           | 34.1 $\pm$ 1.155             |
| 2011               | S        | P         | 100%                 | 9                 | -0.31 $\pm$ 0.034           | -1.498 $\pm$ 0.052         |                            | 0.115 $\pm$ 0.030                           | 35.325 $\pm$ 1.302           |
| 2011               | S        | P         | 100%                 | 13                | -0.475 $\pm$ 0.059          | -1.443 $\pm$ 0.208         | -0.94 $\pm$ 0.110          | 0.123 $\pm$ 0.042                           | 34.9 $\pm$ 1.071             |
| 2011               | S        | P         | 100%                 | 16                | -0.385 $\pm$ 0.012          | -1.593 $\pm$ 0.261         | -0.61 $\pm$ 0.041          | 0.113 $\pm$ 0.030                           | 34.1 $\pm$ 0.868             |
| 2011               | S        | P         | 100%                 | 20                | -0.493 $\pm$ 0.050          | -1.558 $\pm$ 0.262         | -0.883 $\pm$ 0.092         | 0.075 $\pm$ 0.016                           | 33.575 $\pm$ 1.062           |
| 2011               | S        | P         | 100%                 | 27                | -0.388 $\pm$ 0.028          | -1.37 $\pm$ 0.246          | -0.73 $\pm$ 0.024          | 0.113 $\pm$ 0.016                           | 33.05 $\pm$ 1.184            |
| 2011               | S        | P         | 100%                 | 34                | -0.598 $\pm$ 0.058          | -1.395 $\pm$ 0.167         | -0.623 $\pm$ 0.052         | 0.098 $\pm$ 0.025                           | 29.15 $\pm$ 0.748            |
| 2011               | S        | P         | 100%                 | 48                | -0.598 $\pm$ 0.087          | -1.17 $\pm$ 0.054          | -0.735 $\pm$ 0.037         | 0.07 $\pm$ 0.005                            | 32.125 $\pm$ 0.246           |
| 2011               | S        | P         | 100%                 | 55                | -0.415 $\pm$ 0.022          | -1.429 $\pm$ 0.185         | -0.863 $\pm$ 0.079         | 0.091 $\pm$ 0.018                           | 32.8 $\pm$ 0.481             |
| 2011               | S        | R         | 100%                 | 0                 | -0.176 $\pm$ 0.017          | -1.144 $\pm$ 0.101         | -1.083 $\pm$ 0.083         | 0.095 $\pm$ 0.004                           | 34.6 $\pm$ 0.712             |
| 2011               | S        | R         | 100%                 | 6                 | -0.338 $\pm$ 0.023          | -1.038 $\pm$ 0.193         | -1.183 $\pm$ 0.114         | 0.12 $\pm$ 0.038                            | 32.775 $\pm$ 0.523           |
| 2011               | S        | R         | 100%                 | 9                 | -0.308 $\pm$ 0.026          | -0.998 $\pm$ 0.146         |                            | 0.098 $\pm$ 0.028                           | 37.15 $\pm$ 0.879            |

**Supplemental Data for:**

Gerzon, E., I. Biton, Y. Yaniv, H. Zemach, Y. Netzer, A. Schwartz, A. Fait, and G. Ben-Ari. 2015.

Grapevine anatomy as a possible determinant of isohydric or anisohydric behavior.

Am. J. Enol. Vitic. 66:340-347. doi: 10.5344/ajev.2015.14090.

**Supplemental Table 1** All physiological measurements carried out during 2011 and 2012 experiments. Values are mean  $\pm$  standard errors.

| Year of experiment | Cultivar | Rootstock | Irrigation treatment | Day of experiment | Predawn $\Psi_{leaf}$ (MPa) | Midday $\Psi_{leaf}$ (MPa) | Midday $\Psi_{stem}$ (MPa) | Stomatal conductance (mol/m <sup>2</sup> s) | Midday leaf temperature (°C) |
|--------------------|----------|-----------|----------------------|-------------------|-----------------------------|----------------------------|----------------------------|---------------------------------------------|------------------------------|
| 2011               | S        | R         | 100%                 | 13                | -0.53 $\pm$ 0.027           | -1.278 $\pm$ 0.244         | -0.75 $\pm$ 0.065          | 0.113 $\pm$ 0.034                           | 35.05 $\pm$ 1.292            |
| 2011               | S        | R         | 100%                 | 16                | -0.41 $\pm$ 0.047           | -1.063 $\pm$ 0.076         | -0.828 $\pm$ 0.121         | 0.1 $\pm$ 0.024                             | 35.6 $\pm$ 0.527             |
| 2011               | S        | R         | 100%                 | 20                | -0.57 $\pm$ 0.047           | -1.073 $\pm$ 0.187         | -0.81 $\pm$ 0.046          | 0.093 $\pm$ 0.021                           | 36.025 $\pm$ 1.061           |
| 2011               | S        | R         | 100%                 | 27                | -0.435 $\pm$ 0.044          | -1.34 $\pm$ 0.283          | -0.69 $\pm$ 0.059          | 0.088 $\pm$ 0.046                           | 33.075 $\pm$ 1.245           |
| 2011               | S        | R         | 100%                 | 34                | -0.6 $\pm$ 0.047            | -1.39 $\pm$ 0.198          | -0.633 $\pm$ 0.029         | 0.095 $\pm$ 0.025                           | 28.925 $\pm$ 1.074           |
| 2011               | S        | R         | 100%                 | 48                | -0.668 $\pm$ 0.041          | -1.253 $\pm$ 0.013         | -0.798 $\pm$ 0.023         | 0.085 $\pm$ 0.015                           | 32.6 $\pm$ 0.821             |
| 2011               | S        | R         | 100%                 | 55                | -0.513 $\pm$ 0.027          | -1.3 $\pm$ 0.197           | -0.869 $\pm$ 0.020         | 0.105 $\pm$ 0.026                           | 32 $\pm$ 0.558               |
| 2012               | G        | P         | DI                   | 0                 | -0.086 $\pm$ 0.019          | -1.041 $\pm$ 0.014         | -0.545 $\pm$ 0.042         | 0.239 $\pm$ 0.039                           | 34.965 $\pm$ 0.148           |
| 2012               | G        | P         | DI                   | 3                 | -0.08 $\pm$ 0.014           | -1.103 $\pm$ 0.061         | -0.504 $\pm$ 0.042         | 0.177 $\pm$ 0.035                           | 35.753 $\pm$ 0.344           |
| 2012               | G        | P         | DI                   | 10                | -0.099 $\pm$ 0.010          | -0.956 $\pm$ 0.085         | -0.705 $\pm$ 0.047         | 0.081 $\pm$ 0.011                           | 36.062 $\pm$ 0.976           |
| 2012               | G        | P         | DI                   | 17                | -0.235 $\pm$ 0.011          | -0.815 $\pm$ 0.066         | -0.848 $\pm$ 0.056         | 0.037 $\pm$ 0.004                           | 38.147 $\pm$ 0.292           |
| 2012               | G        | P         | DI                   | 24                | -0.346 $\pm$ 0.020          | -1.135 $\pm$ 0.097         | -0.769 $\pm$ 0.074         | 0.034 $\pm$ 0.003                           | 38.406 $\pm$ 0.571           |
| 2012               | G        | P         | DI                   | 31                | -0.393 $\pm$ 0.052          | -1.109 $\pm$ 0.090         | -0.895 $\pm$ 0.063         | 0.089 $\pm$ 0.014                           | 34.813 $\pm$ 0.020           |
| 2012               | G        | P         | DI                   | 38                | -0.368 $\pm$ 0.032          | -1.051 $\pm$ 0.056         | -0.825 $\pm$ 0.059         | 0.059 $\pm$ 0.012                           | 40.552 $\pm$ 0.634           |
| 2012               | G        | P         | DI                   | 45                | -0.394 $\pm$ 0.040          | -0.968 $\pm$ 0.107         | -0.833 $\pm$ 0.059         | 0.065 $\pm$ 0.011                           | 35.849 $\pm$ 1.001           |
| 2012               | G        | P         | DI                   | 52                | -0.364 $\pm$ 0.045          | -1.046 $\pm$ 0.083         |                            | 0.053 $\pm$ 0.012                           | 38.127 $\pm$ 0.166           |
| 2012               | G        | P         | DI                   | 59                | -0.335 $\pm$ 0.048          | -0.84 $\pm$ 0.104          | -0.75 $\pm$ 0.024          | 0.077 $\pm$ 0.013                           | 37.305 $\pm$ 0.065           |
| 2012               | G        | R         | DI                   | 0                 | -0.081 $\pm$ 0.015          | -1.154 $\pm$ 0.149         | -0.592 $\pm$ 0.051         | 0.281 $\pm$ 0.033                           | 34.939 $\pm$ 0.125           |
| 2012               | G        | R         | DI                   | 3                 | -0.06 $\pm$ 0.009           | -1.108 $\pm$ 0.151         | -0.571 $\pm$ 0.031         | 0.223 $\pm$ 0.031                           | 35.251 $\pm$ 0.292           |
| 2012               | G        | R         | DI                   | 10                | -0.091 $\pm$ 0.015          | -0.928 $\pm$ 0.064         | -0.766 $\pm$ 0.047         | 0.15 $\pm$ 0.042                            | 35.489 $\pm$ 0.491           |
| 2012               | G        | R         | DI                   | 17                | -0.251 $\pm$ 0.079          | -0.725 $\pm$ 0.049         | -0.873 $\pm$ 0.037         | 0.057 $\pm$ 0.019                           | 37.955 $\pm$ 0.425           |
| 2012               | G        | R         | DI                   | 24                | -0.349 $\pm$ 0.092          | -1.028 $\pm$ 0.124         | -0.821 $\pm$ 0.041         | 0.026 $\pm$ 0.008                           | 38.495 $\pm$ 0.424           |
| 2012               | G        | R         | DI                   | 31                | -0.44 $\pm$ 0.129           | -0.889 $\pm$ 0.051         | -1.008 $\pm$ 0.109         | 0.072 $\pm$ 0.019                           | 34.837 $\pm$ 0.019           |
| 2012               | G        | R         | DI                   | 38                | -0.381 $\pm$ 0.060          | -0.989 $\pm$ 0.038         | -0.934 $\pm$ 0.101         | 0.041 $\pm$ 0.013                           | 40.641 $\pm$ 0.498           |
| 2012               | G        | R         | DI                   | 45                | -0.429 $\pm$ 0.083          | -0.989 $\pm$ 0.086         | -0.88 $\pm$ 0.061          | 0.073 $\pm$ 0.015                           | 35.994 $\pm$ 1.139           |
| 2012               | G        | R         | DI                   | 52                | -0.438 $\pm$ 0.063          | -0.966 $\pm$ 0.031         | $\pm$                      | 0.049 $\pm$ 0.008                           | 38.038 $\pm$ 0.076           |
| 2012               | G        | R         | DI                   | 59                | -0.394 $\pm$ 0.056          | -0.915 $\pm$ 0.073         | -0.835 $\pm$ 0.068         | 0.093 $\pm$ 0.003                           | 36.884 $\pm$ 0.105           |
| 2012               | S        | P         | DI                   | 0                 | -0.093 $\pm$ 0.015          | -0.959 $\pm$ 0.067         | -0.513 $\pm$ 0.054         | 0.191 $\pm$ 0.045                           | 35.277 $\pm$ 0.585           |
| 2012               | S        | P         | DI                   | 3                 | -0.103 $\pm$ 0.028          | -1.156 $\pm$ 0.077         | -0.533 $\pm$ 0.043         | 0.172 $\pm$ 0.012                           | 35.619 $\pm$ 0.268           |
| 2012               | S        | P         | DI                   | 10                | -0.083 $\pm$ 0.005          | -0.953 $\pm$ 0.026         | -0.79 $\pm$ 0.094          | 0.092 $\pm$ 0.025                           | 36.817 $\pm$ 0.419           |
| 2012               | S        | P         | DI                   | 17                | -0.169 $\pm$ 0.022          | -0.823 $\pm$ 0.057         | -0.88 $\pm$ 0.073          | 0.045 $\pm$ 0.007                           | 38.382 $\pm$ 0.197           |
| 2012               | S        | P         | DI                   | 24                | -0.303 $\pm$ 0.045          | -1.075 $\pm$ 0.069         | -0.828 $\pm$ 0.086         | 0.024 $\pm$ 0.004                           | 39.001 $\pm$ 0.296           |
| 2012               | S        | P         | DI                   | 31                | -0.325 $\pm$ 0.066          | -1.146 $\pm$ 0.212         | -1.126 $\pm$ 0.103         | 0.062 $\pm$ 0.020                           | 34.77 $\pm$ 0.023            |
| 2012               | S        | P         | DI                   | 38                | -0.361 $\pm$ 0.045          | -1.248 $\pm$ 0.082         | -0.921 $\pm$ 0.070         | 0.05 $\pm$ 0.006                            | 40.974 $\pm$ 0.212           |
| 2012               | S        | P         | DI                   | 45                | -0.413 $\pm$ 0.028          | -1.023 $\pm$ 0.127         | -0.993 $\pm$ 0.064         | 0.053 $\pm$ 0.009                           | 35.116 $\pm$ 0.264           |
| 2012               | S        | P         | DI                   | 52                | -0.5 $\pm$ 0.064            | -1.305 $\pm$ 0.103         |                            | 0.046 $\pm$ 0.008                           | 37.934 $\pm$ 0.344           |
| 2012               | S        | P         | DI                   | 59                | -0.449 $\pm$ 0.032          | -0.918 $\pm$ 0.066         | -0.885 $\pm$ 0.047         | 0.074 $\pm$ 0.011                           | 37.193 $\pm$ 0.228           |
| 2012               | S        | R         | DI                   | 0                 | -0.088 $\pm$ 0.007          | -1.07 $\pm$ 0.043          | -0.613 $\pm$ 0.046         | 0.308 $\pm$ 0.079                           | 34.799 $\pm$ 0.398           |
| 2012               | S        | R         | DI                   | 3                 | -0.095 $\pm$ 0.013          | -1.144 $\pm$ 0.092         | -0.604 $\pm$ 0.029         | 0.145 $\pm$ 0.034                           | 35.895 $\pm$ 0.266           |
| 2012               | S        | R         | DI                   | 10                | -0.081 $\pm$ 0.003          | -1.094 $\pm$ 0.095         | -0.803 $\pm$ 0.011         | 0.125 $\pm$ 0.049                           | 36.011 $\pm$ 0.417           |
| 2012               | S        | R         | DI                   | 17                | -0.178 $\pm$ 0.044          | -0.905 $\pm$ 0.100         | -1.141 $\pm$ 0.088         | 0.054 $\pm$ 0.015                           | 38.193 $\pm$ 0.197           |
| 2012               | S        | R         | DI                   | 24                | -0.343 $\pm$ 0.049          | -1.104 $\pm$ 0.049         | -0.995 $\pm$ 0.029         | 0.074 $\pm$ 0.020                           | 38.381 $\pm$ 0.362           |
| 2012               | S        | R         | DI                   | 31                | -0.395 $\pm$ 0.062          | -1.245 $\pm$ 0.168         | -1.331 $\pm$ 0.212         | 0.07 $\pm$ 0.031                            | 34.799 $\pm$ 0.016           |
| 2012               | S        | R         | DI                   | 38                | -0.453 $\pm$ 0.048          | -1.148 $\pm$ 0.236         | -0.951 $\pm$ 0.058         | 0.076 $\pm$ 0.014                           | 41.077 $\pm$ 0.299           |
| 2012               | S        | R         | DI                   | 45                | -0.564 $\pm$ 0.045          | -1.163 $\pm$ 0.167         | -1.021 $\pm$ 0.091         | 0.058 $\pm$ 0.026                           | 36.037 $\pm$ 1.148           |
| 2012               | S        | R         | DI                   | 52                | -0.59 $\pm$ 0.031           | -1.098 $\pm$ 0.133         |                            | 0.074 $\pm$ 0.027                           | 37.753 $\pm$ 0.242           |
| 2012               | S        | R         | DI                   | 59                | -0.523 $\pm$ 0.039          | -1.113 $\pm$ 0.082         | -1.013 $\pm$ 0.069         | 0.078 $\pm$ 0.021                           | 37.261 $\pm$ 0.256           |
| 2012               | G        | P         | control              | 0                 | -0.086 $\pm$ 0.019          | -1.041 $\pm$ 0.014         | -0.545 $\pm$ 0.042         | 0.239 $\pm$ 0.039                           | 34.965 $\pm$ 0.148           |
| 2012               | G        | P         | control              | 3                 | -0.084 $\pm$ 0.010          | -1.074 $\pm$ 0.018         | -0.548 $\pm$ 0.027         | 0.206 $\pm$ 0.023                           | 35.513 $\pm$ 0.287           |
| 2012               | G        | P         | control              | 10                | -0.079 $\pm$ 0.010          | -0.986 $\pm$ 0.034         | -0.62 $\pm$ 0.039          | 0.219 $\pm$ 0.026                           | 35.637 $\pm$ 0.581           |
| 2012               | G        | P         | control              | 17                | -0.084 $\pm$ 0.005          | -0.78 $\pm$ 0.023          | -0.708 $\pm$ 0.026         | 0.143 $\pm$ 0.010                           | 37.001 $\pm$ 0.184           |

**Supplemental Data for:**

Gerzon, E., I. Biton, Y. Yaniv, H. Zemach, Y. Netzer, A. Schwartz, A. Fait, and G. Ben-Ari. 2015.

Grapevine anatomy as a possible determinant of isohydric or anisohydric behavior.

Am. J. Enol. Vitic. 66:340-347. doi: 10.5344/ajev.2015.14090.

**Supplemental Table 1** All physiological measurements carried out during 2011 and 2012 experiments. Values are mean ± standard errors.

| Year of experiment | Cultivar | Rootstock | Irrigation treatment | Day of experiment | Predawn $\Psi$ leaf (MPa) | Midday $\Psi$ leaf (MPa) | Midday $\Psi$ stem (MPa) | Stomatal conductance (mol/m <sup>2</sup> s) | Midday leaf temperature (°C) |
|--------------------|----------|-----------|----------------------|-------------------|---------------------------|--------------------------|--------------------------|---------------------------------------------|------------------------------|
| 2012               | G        | P         | control              | 24                | -0.084±0.003              | -0.899±0.035             | -0.635±0.039             | 0.175±0.009                                 | 37.414±0.264                 |
| 2012               | G        | P         | control              | 31                | -0.083±0.008              | -0.708±0.072             | -0.785±0.046             | 0.176±0.020                                 | 34.829±0.018                 |
| 2012               | G        | P         | control              | 38                | -0.113±0.012              | -0.883±0.101             | -0.806±0.083             | 0.103±0.019                                 | 41.09±0.243                  |
| 2012               | G        | P         | control              | 45                | -0.153±0.008              | -0.843±0.031             | -0.695±0.092             | 0.13±0.012                                  | 36.044±1.166                 |
| 2012               | G        | P         | control              | 52                | -0.2±0.033                | -0.828±0.053             |                          | 0.105±0.011                                 | 37.209±0.182                 |
| 2012               | G        | P         | control              | 59                | -0.2±0.022                | -0.694±0.035             | -0.733±0.163             | 0.11±0.020                                  | 36.843±0.266                 |
| 2012               | G        | R         | control              | 0                 | -0.081±0.015              | -1.154±0.149             | -0.592±0.051             | 0.281±0.033                                 | 34.939±0.125                 |
| 2012               | G        | R         | control              | 3                 | -0.075±0.005              | -1.113±0.061             | -0.578±0.087             | 0.272±0.012                                 | 35.011±0.252                 |
| 2012               | G        | R         | control              | 10                | -0.073±0.014              | -1.068±0.076             | -0.623±0.109             | 0.247±0.031                                 | 36.003±0.285                 |
| 2012               | G        | R         | control              | 17                | -0.076±0.005              | -0.856±0.020             | -0.708±0.089             | 0.178±0.006                                 | 36.736±0.274                 |
| 2012               | G        | R         | control              | 24                | -0.119±0.020              | -0.883±0.071             | -0.705±0.034             | 0.178±0.015                                 | 37.479±0.186                 |
| 2012               | G        | R         | control              | 31                | -0.118±0.011              | -0.938±0.054             | -0.869±0.056             | 0.173±0.016                                 | 34.84±0.015                  |
| 2012               | G        | R         | control              | 38                | -0.156±0.010              | -0.846±0.064             | -0.77±0.106              | 0.129±0.003                                 | 41.205±0.235                 |
| 2012               | G        | R         | control              | 45                | -0.195±0.044              | -0.819±0.030             | -0.75±0.063              | 0.176±0.006                                 | 34.858±0.017                 |
| 2012               | G        | R         | control              | 52                | -0.13±0.026               | -0.888±0.082             |                          | 0.158±0.005                                 | 36.932±0.069                 |
| 2012               | G        | R         | control              | 59                | -0.245±0.013              | -0.714±0.078             | -0.67±0.025              | 0.134±0.008                                 | 36.713±0.157                 |
| 2012               | S        | P         | control              | 0                 | -0.093±0.015              | -0.959±0.067             | -0.513±0.054             | 0.191±0.045                                 | 35.277±0.585                 |
| 2012               | S        | P         | control              | 3                 | -0.138±0.028              | -1.243±0.050             | -0.528±0.059             | 0.21±0.029                                  | 35.18±0.362                  |
| 2012               | S        | P         | control              | 10                | -0.086±0.005              | -1.045±0.057             | -0.483±0.061             | 0.201±0.040                                 | 35.437±0.550                 |
| 2012               | S        | P         | control              | 17                | -0.101±0.009              | -0.775±0.063             | -0.768±0.034             | 0.144±0.011                                 | 36.838±0.156                 |
| 2012               | S        | P         | control              | 24                | -0.155±0.025              | -0.974±0.059             | -0.759±0.066             | 0.256±0.033                                 | 36.832±0.550                 |
| 2012               | S        | P         | control              | 31                | -0.134±0.023              | -1.075±0.063             | -1.06±0.142              | 0.172±0.037                                 | 34.831±0.009                 |
| 2012               | S        | P         | control              | 38                | -0.255±0.035              | -1.158±0.026             | -0.856±0.054             | 0.148±0.013                                 | 40.907±0.436                 |
| 2012               | S        | P         | control              | 45                | -0.23±0.018               | -0.953±0.043             | -0.793±0.062             | 0.211±0.016                                 | 36.041±1.166                 |
| 2012               | S        | P         | control              | 52                | -0.225±0.026              | -1.123±0.068             |                          | 0.146±0.030                                 | 37.1±0.193                   |
| 2012               | S        | P         | control              | 59                | -0.328±0.026              | -1.029±0.070             | -0.826±0.044             | 0.18±0.021                                  | 36.494±0.254                 |
| 2012               | S        | R         | control              | 0                 | -0.088±0.007              | -1.07±0.043              | -0.613±0.046             | 0.308±0.079                                 | 34.799±0.398                 |
| 2012               | S        | R         | control              | 3                 | -0.126±0.023              | -1.239±0.060             | -0.596±0.059             | 0.25±0.028                                  | 34.837±0.524                 |
| 2012               | S        | R         | control              | 10                | -0.086±0.015              | -0.906±0.111             | -0.626±0.037             | 0.261±0.043                                 | 35.383±0.500                 |
| 2012               | S        | R         | control              | 17                | -0.124±0.042              | -0.689±0.064             | -0.819±0.056             | 0.217±0.026                                 | 36.434±0.211                 |
| 2012               | S        | R         | control              | 24                | -0.17±0.037               | -1.23±0.063              | -0.77±0.096              | 0.262±0.031                                 | 37.048±0.295                 |
| 2012               | S        | R         | control              | 31                | -0.164±0.050              | -1.065±0.154             | -1.005±0.097             | 0.261±0.036                                 | 34.833±0.016                 |
| 2012               | S        | R         | control              | 38                | -0.273±0.074              | -0.969±0.137             | -0.806±0.102             | 0.17±0.026                                  | 40.781±0.613                 |
| 2012               | S        | R         | control              | 45                | -0.261±0.073              | -0.936±0.097             | -1.003±0.053             | 0.23±0.031                                  | 34.867±0.013                 |
| 2012               | S        | R         | control              | 52                | -0.211±0.044              | -1.144±0.116             |                          | 0.193±0.051                                 | 36.855±0.342                 |
| 2012               | S        | R         | control              | 59                | -0.344±0.085              | -0.903±0.119             | -0.821±0.081             | 0.193±0.054                                 | 36.153±0.527                 |

**Supplemental Data for:**

Gerzon, E., I. Biton, Y. Yaniv, H. Zemach, Y. Netzer, A. Schwartz, A. Fait, and G. Ben-Ari. 2015. Grapevine anatomy as a possible determinant of isohydric or anisohydric behavior. *Am. J. Enol. Vitic.* 66:340-347. doi: 10.5344/ajev.2015.14090.

---

---

**Supplemental Table 2** Correlation coefficients between noon  $\Psi_l$  ( $\Psi_l$ ) and evapotranspiration (E), predawn water potential ( $\Psi_{PD}$ ), stem water potential ( $\Psi_s$ ), stomatal conductance ( $g_s$ ), and photosynthetic  $CO_2$  assimilation (A), respectively, under well-watered (control) and deficit-irrigated (DI) conditions.

| Parameter               | Parameter   | Correlation coefficient |
|-------------------------|-------------|-------------------------|
| <b>Grenache DI</b>      |             |                         |
| $\Psi_l$                | E           | -0.2568                 |
| $\Psi_l$                | $\Psi_{PD}$ | 0.0413                  |
| $\Psi_l$                | $\Psi_s$    | -0.2636                 |
| $\Psi_l$                | $g_s$       | -0.2616                 |
| $\Psi_l$                | A           | -0.0915                 |
| <b>Grenache control</b> |             |                         |
| $\Psi_l$                | E           | -0.8691                 |
| $\Psi_l$                | $\Psi_{PD}$ | -0.4826                 |
| $\Psi_l$                | $\Psi_s$    | -0.8478                 |
| $\Psi_l$                | $g_s$       | -0.6912                 |
| $\Psi_l$                | A           | -0.5317                 |
| <b>Shiraz DI</b>        |             |                         |
| $\Psi_l$                | E           | 0.0579                  |
| $\Psi_l$                | $\Psi_{PD}$ | 0.4331                  |
| $\Psi_l$                | $\Psi_s$    | 0.1869                  |
| $\Psi_l$                | $g_s$       | 0.1277                  |
| $\Psi_l$                | A           | 0.2274                  |
| <b>Shiraz control</b>   |             |                         |
| $\Psi_l$                | E           | -0.2                    |
| $\Psi_l$                | $\Psi_{PD}$ | 0.2654                  |
| $\Psi_l$                | $\Psi_s$    | -0.0362                 |
| $\Psi_l$                | $g_s$       | -0.0114                 |
| $\Psi_l$                | A           | -0.0104                 |



**Supplemental Data for:**

Gerzon, E., I. Biton, Y. Yaniv, H. Zemach, Y. Netzer, A. Schwartz, A. Fait, and G. Ben-Ari. 2015. Grapevine anatomy as a possible determinant of isohydric or anisohydric behavior. *Am. J. Enol. Vitic.* 66:340-347. doi: 10.5344/ajev.2015.14090.

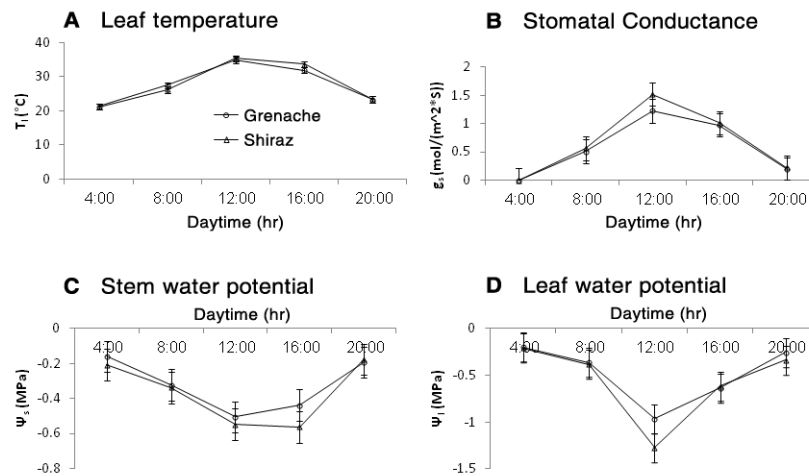

**Supplemental Figure 1** The cultivars Grenache and Shiraz expressed distinct physiological characteristic at noon: Diurnal fluctuations of  $T_l$  (A),  $g_s$  (B),  $\Psi_s$  (C), and  $\Psi_l$  (D). Each cultivar is represented by a different symbol (circles indicate Grenache and triangles indicate Shiraz). Error bars represent 95% confidence intervals.

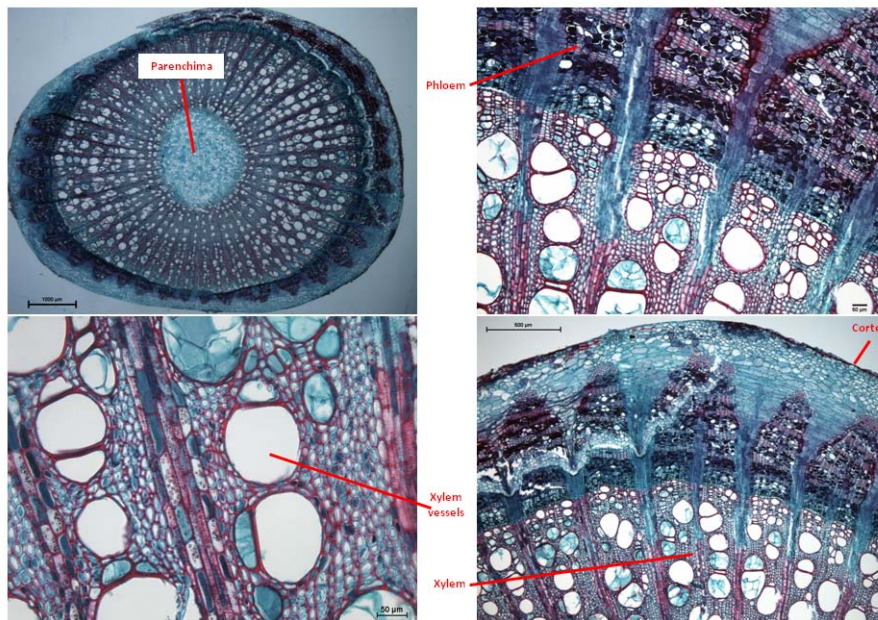

**Supplemental Figure 2** Light microscopic images of the stem and xylem of Shiraz plants.
